# Supplementary material
Source: publisher figshare collection journal article supplement (https://acs.figshare.com/ndownloader/files/13879772)
Supplement: Supplementary file 1 [file 13879772]

## *Supporting Information*

### Antimicrobial Titanium Surface via Click-Immobilization of Peptide and Its in Vitro/Vivo Activity

*Junjian Chen<sup>1,2,3,4,‡</sup>, Yuchen Zhu<sup>4,‡</sup>, Menghua Xiong<sup>1</sup>, Guansong Hu<sup>2</sup>, Jiezhao Zhan<sup>4</sup>, Tianjie Li<sup>1,3</sup>,*

*Lin Wang<sup>1,3,\*</sup>, Yingjun Wang<sup>1, 2,3,4,\*</sup>*

1. School of Biomedical Science and Engineering, South China University of Technology, Higher Education Mega Center, Panyu, Guangzhou 510006, China.

2. National Engineering Research Center for Tissue Restoration and Reconstruction, South China University of Technology, Higher Education Mega Center, Panyu, Guangzhou 510006, China.

3. Key Laboratory of Biomedical Materials and Engineering of the Ministry of Education, South China University of Technology, Wushan Road, Tianhe, Guangzhou 510641, China.

4. Guangdong Province Key Laboratory of Biomedical Engineering, South China University of Technology, Higher Education Mega Center, Panyu, Guangzhou 510006, China.

\* [wanglin3@scut.edu.cn](mailto:wanglin3@scut.edu.cn)

\* [imwangyj@scut.edu.cn](mailto:imwangyj@scut.edu.cn)

**Figure S1.** The high-resolution XPS Si 2p spectrum of *Ti* and *Ti*-*APTS*.

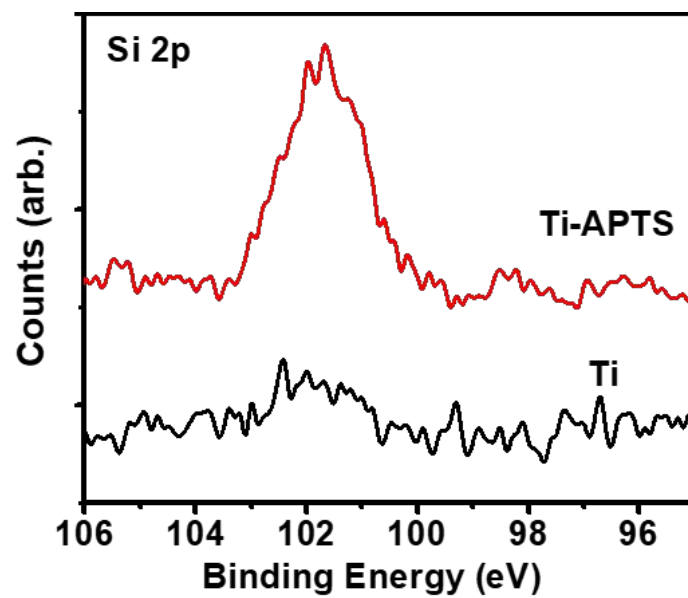

**Figure S2.** The high-resolution XPS Cu 2p spectrum of *Ti-AMP*.

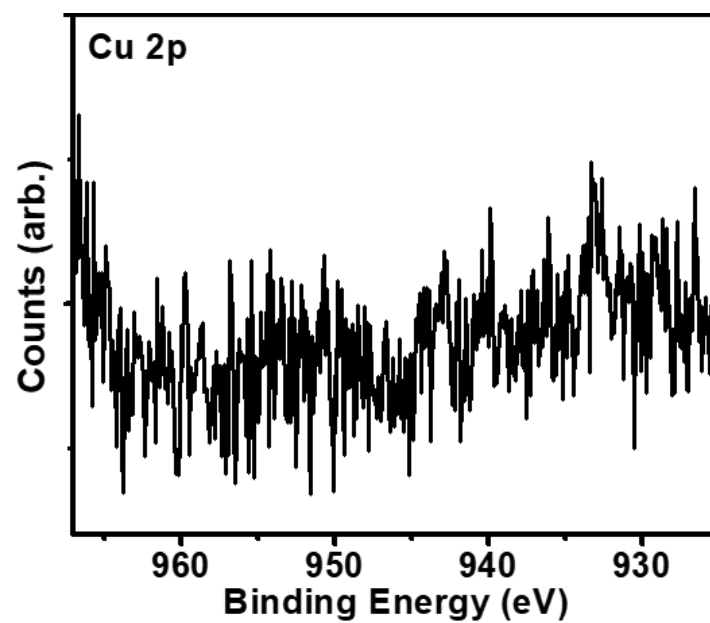

**Figure S3.** The AFM 3D-microtopography of (a) *Ti* and (b) *Ti-100AMP*.

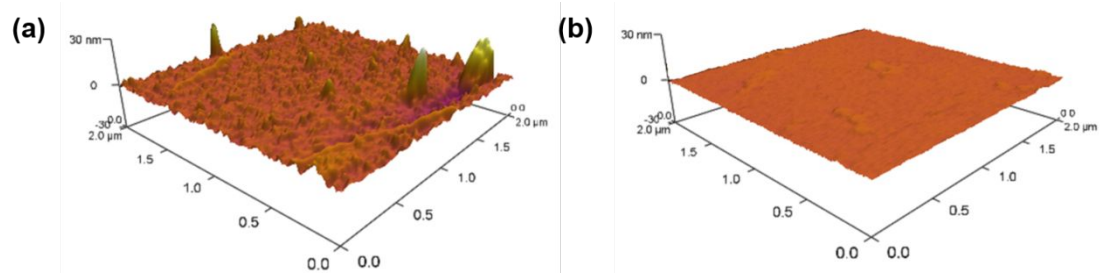

**Figure S4.** The contact angles of indicated substrates. # denotes significant differences ( $p < 0.01$ ) and & denotes significant differences ( $p < 0.001$ ) compared with *Ti*.

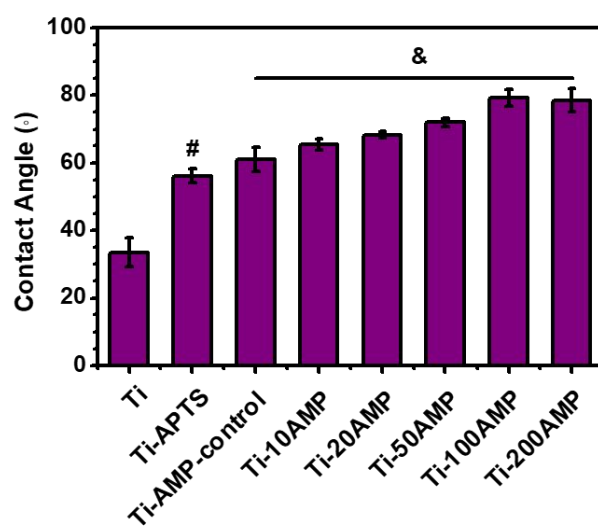

**Figure S5.** (a) The QCM-D assay for the click reaction on the QCM-D chip. (b) The high-resolution XPS N 1s spectrum of the QCM-D chip after click reaction.

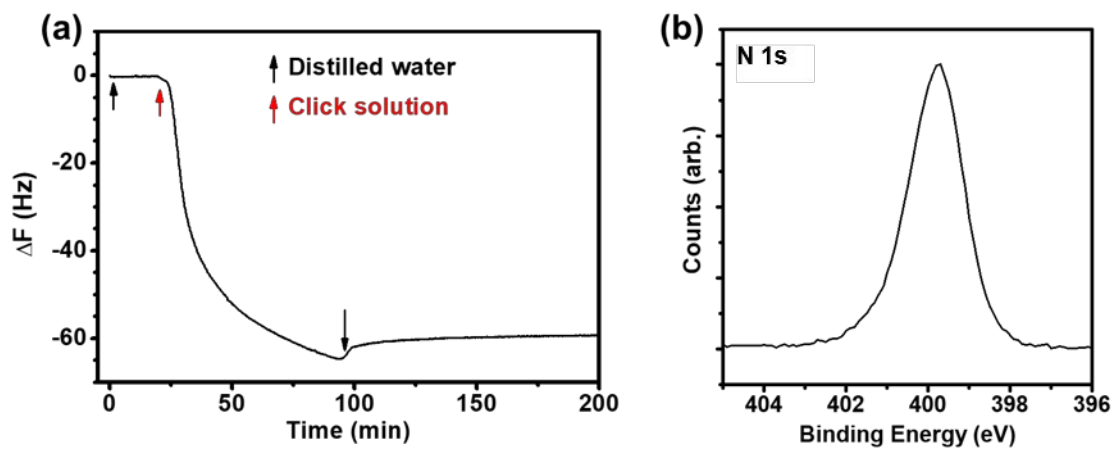

**Figure S6.** The live/dead assay of *E. coli* on the indicated substrates. (The images were got under FITC and TRITC channels, and merged with the NIS software. The green bacteria were live, while the red bacteria were dead)

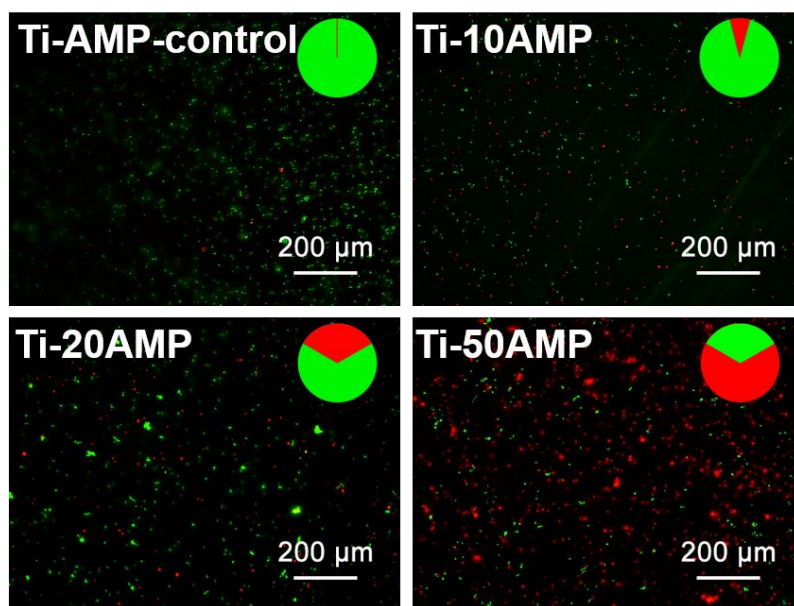

**Figure S7.** The stability of the antimicrobial activity of *Ti-100AMP* against *S. aureus*.

# denotes significant differences ( $p < 0.01$ ) compared with *Ti-AMP-control* (Control).

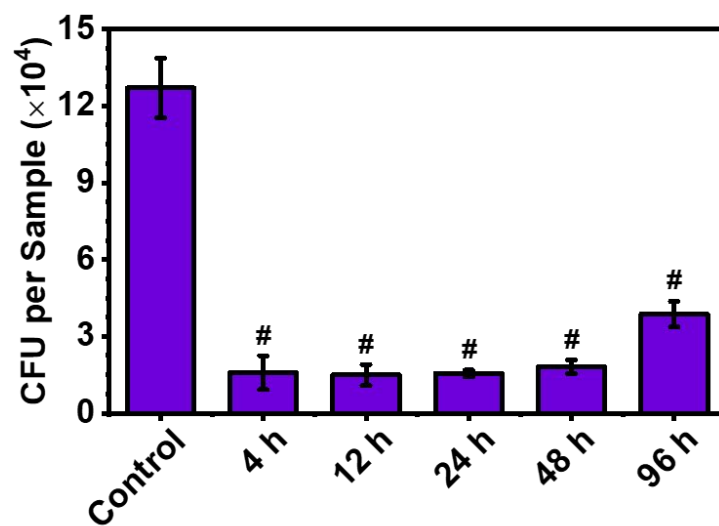



**Figure S8.** The morphology of *mBMSCs* on the indicated substrates after 24 h in culturing. The scale bar denotes 200  $\mu\text{m}$ .

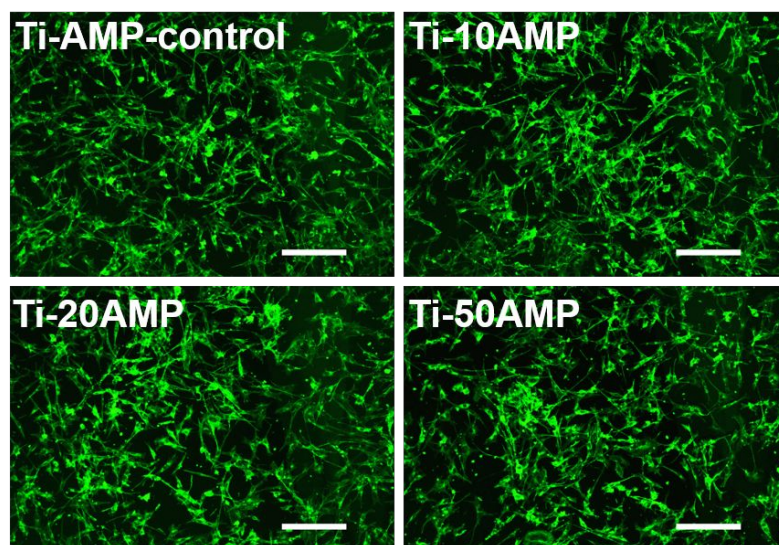

**Figure S9.** Photomicrographs of longitudinal sections of proximal tibia in (a) - (e) *Ti-AMP-control* and (f) - (j) *Ti-AMP* of rabbits in H&E staining. (k) the quantification of the inflammatory cells in *Ti-AMP-control* and *Ti-AMP* (n=6, and the other images were shown in Figure 7(c) and (d) in manuscript). The scale bar denotes 100  $\mu$ m.

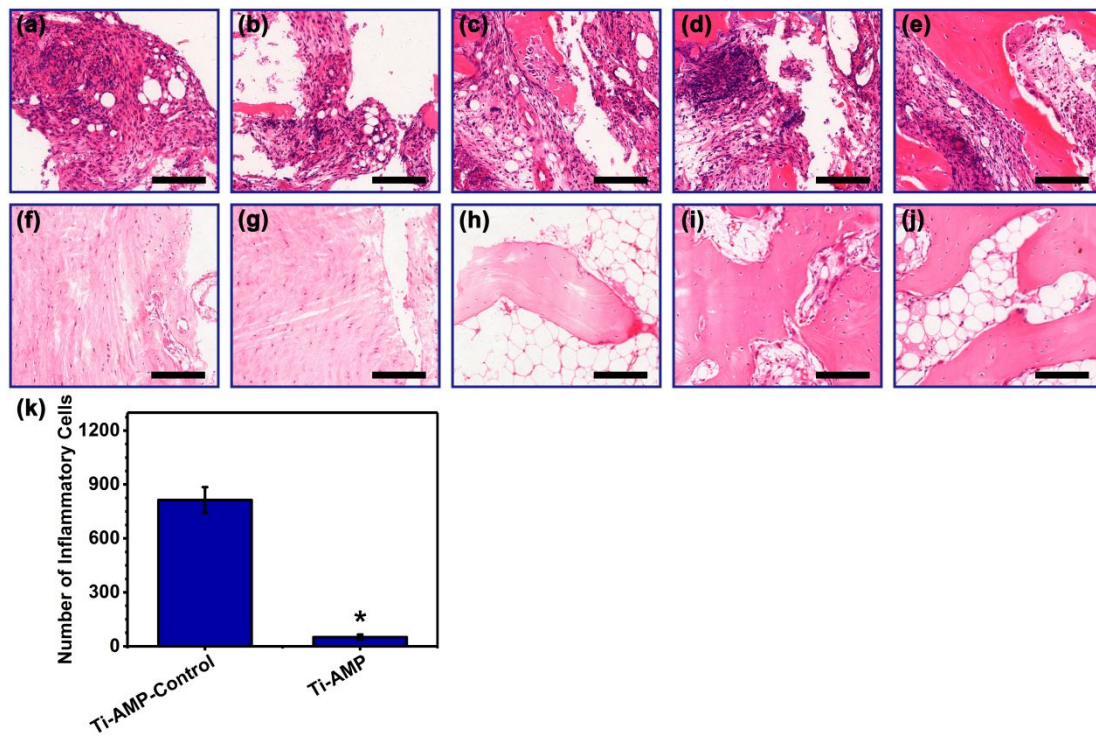

**Table S1.** The abbreviations of different substrates.

| Substrates<br>Abbreviation         | Treatment Method                                                                                                |
|------------------------------------|-----------------------------------------------------------------------------------------------------------------|
| <i>Ti</i>                          | Pristine Ti substrate                                                                                           |
| <i>Ti-APTS</i>                     | <i>Ti</i> + silane coupling agent (APTS)                                                                        |
| <i>Ti-biotin-control</i>           | <i>Ti-APTS</i> + click solution with 100 $\mu\text{M}$ of biotin-azide and 0 $\mu\text{M}$ of $\text{CuSO}_4$   |
| <i>Ti-biotin</i>                   | <i>Ti-APTS</i> + click solution with 100 $\mu\text{M}$ of biotin-azide and 100 $\mu\text{M}$ of $\text{CuSO}_4$ |
| <i>Ti-AMP-control</i>              | <i>Ti-APTS</i> + click solution (with 100 $\mu\text{M}$ of PEG-HHC36) without $\text{CuSO}_4$                   |
| <i>Ti-10AMP</i>                    | <i>Ti-APTS</i> + click solution with 10 $\mu\text{M}$ of PEG-HHC36 peptide                                      |
| <i>Ti-20AMP</i>                    | <i>Ti-APTS</i> + click solution with 20 $\mu\text{M}$ of PEG-HHC36 peptide                                      |
| <i>Ti-50AMP</i>                    | <i>Ti-APTS</i> + click solution with 50 $\mu\text{M}$ of PEG-HHC36 peptide                                      |
| <i>Ti-100AMP/</i><br><i>Ti-AMP</i> | <i>Ti-APTS</i> + click solution with 100 $\mu\text{M}$ of PEG-HHC36 peptide                                     |
| <i>Ti-200AMP</i>                   | <i>Ti-APTS</i> + click solution with 200 $\mu\text{M}$ of PEG-HHC36 peptide                                     |
